# Supplementary material
Source: PubMed Central journal article supplement (PMC2474484)
Supplement: 0803479105_0803479105SI.pdf [file 0803479105_0803479105SI.pdf]

# Supporting Information

Martínez and Reyes-Valdés 10.1073/pnas.0803479105

## SI Text

**Mutual Information  $I(X|Y)$ .** In all cases, the units of the herein proposed parameters are bits; however, for simplicity we will omit the units in this appendix.

Let  $X$  be a random variable that takes on values  $j = 1, 2, \dots, t$  (subsystems: tissues or conditions), and  $Y$  a random variable that takes on values  $i = 1, 2, \dots, g$  (genes). Since  $p_{ij}$  is the frequency of the  $i$ th transcript within the  $j$ th subsystem,  $p(i|j) = p_{ij}$ . Now,  $p(i, j) = (1/t)p_{ij}$ , given that we consider all subsystem to be equiprobably distributed; for the same reason,  $p(i) = p_i$ , the average frequency across subsystems.

The average mutual information  $I(X|Y)$  equals by symmetry  $I(Y|X)$ , which in turn can be defined as

$$\begin{aligned} I(Y|X) &= H(Y) - H(Y|X) \\ &= -\sum_{i=1}^g \sum_{j=1}^t p(i, j) \log_2[p(i)] \\ &\quad + \sum_{i=1}^g \sum_{j=1}^t p(i, j) \log_2[p(i|j)] \\ &= -\sum_{i=1}^g \sum_{j=1}^t \frac{1}{t} p_{ij} \log_2(p_i) + \sum_{i=1}^g \sum_{j=1}^t \frac{1}{t} p_{ij} \log_2(p_{ij}) \end{aligned}$$

**Information Meaning of Gene Specificity  $S_i$ .** The measure  $S_i$  is the conditional mutual information  $I(X|Y = i)$ , as it will be proved with the following arguments.

The expression for Eq. 3 can be rearranged as:

$$S_i = \sum_{j=1}^t \frac{p_{ij}}{tp_i} \log_2\left(\frac{p_{ij}}{p_i}\right)$$

From Eq. 2, it is easy to see that

$$\sum_{j=1}^t \frac{p_{ij}}{tp_i} = 1$$

This allows the following rearrangement of the expression for  $S_i$

$$\begin{aligned} S_i &= \log_2(t) - \sum_{j=1}^t \frac{p_{ij}}{tp_i} \log_2(t) + \sum_{j=1}^t \frac{p_{ij}}{tp_i} \log_2\left(\frac{p_{ij}}{p_i}\right) \\ &= \log_2(t) + \sum_{j=1}^t \frac{p_{ij}}{tp_i} \left[ \log_2\left(\frac{p_{ij}}{p_i}\right) - \log_2(t) \right] \\ &= \log_2(t) + \sum_{j=1}^t \frac{p_{ij}}{tp_i} \log_2\left(\frac{p_{ij}}{tp_i}\right) \end{aligned}$$

The negative of the second term of the last expression is the entropy  $H(X|Y = i)$ , i.e., the conditional uncertainty of  $X$  given  $Y = i$ . This is because  $p(j|i) = p_{ij}/tp_i$ , as proved by the Bayes theorem:

$$p(j|i) = \frac{p(i|j)p(j)}{p(i)} = \frac{p_{ij} \frac{1}{t}}{p_i} = \frac{p_{ij}}{tp_i}$$

Thus:

$$S_i = H(X) - H(X|Y = i) = I(X|Y = i)$$

Then, the information  $I(X|Y)$  is the weighted average of the  $S_i$  values across all genes:

$$I(X|Y) = \sum_{i=1}^g p_i I(X|Y = i) = \sum_{i=1}^g p_i S_i$$

**Range of  $S_i$ .** Given that the gene specificity  $S_i$  equals  $I(X|Y = i)$ , its lower and upper bounds are 0 and  $\log_2(t)$ , respectively. From Eq. 3, it is easy to see that the minimum is attained when  $p_{ij} = p_i$  for all  $j$ , i.e., when the transcription frequency is totally uniform across subsystems. The maximum value is reached when  $p_{ij} = tp_i$  for a given  $j$ , and  $p_{ij} = 0$  for all others (Eq. 3), i.e., when the gene is exclusively transcribed in one subsystem.

**Range of  $\delta_j$ .** The maximum value for  $S_i$  has been established to be  $\log_2(t)$ , and this sets the upper bound of  $\delta_j$  (Eq. 4), the weighted average of  $S_i$  in  $\log_2(t)$ . This maximum is reached when for all  $i$  such that  $p_{ij} > 0$ ,  $p_i = p_{ij}/t$ , the condition that makes  $S_i = \log_2(t)$  (Eq. 3). This is the situation when all transcribed genes in the subsystem  $j$ , i.e., those with  $p_{ij} > 0$ , are transcribed only in that subsystem. On the other hand,  $\text{Min}(S_i) = 0$ , which sets the lower bound of  $\delta_j$  in 0 when  $p_{ij} = p_i$  for all  $i, j$ , i.e., when all genes have the same average specificity. An important feature of  $\delta_j$  is that it takes a value of 0 if and only if all other subsystems have also values of 0.

The relationship between the average of  $\delta_j$  and the mutual information  $I(X|Y)$  can be seen in the following equality:

$$\frac{1}{t} \sum_{j=1}^t \delta_j = \frac{1}{t} \sum_{j=1}^t \sum_{i=1}^g p_{ij} S_i = \frac{1}{t} \sum_{i=1}^g S_i \sum_{j=1}^t p_{ij} = \sum_{i=1}^g p_i S_i = I(X|Y)$$

**The Kullback–Leibler Divergence.** This measure, based on the concept of relative entropy (1, 2), can be used to compare a distribution or series of distributions against one with fixed parameters. In this case, we use the Kullback–Leibler divergence to evaluate the departure from the transcription distribution of a given subsystem from a distribution formed by the arithmetic averages of the transcription frequencies across subsystems.

$$D_j = \sum_{i=1}^g p_{ij} \log_2\left(\frac{p_{ij}}{p_i}\right)$$

$D_j$  is the weighted average of  $\log_2(p_{ij}/p_i)$  for the  $j$ th subsystem. Given that the  $\log$  function is monotonically increasing for any base  $b \geq 1$ , the maximum term for any fixed  $p_{ij}$  in the  $\log_2$  function will correspond to  $\text{Max}[p_{ij}/p_i]$ . This maximum is attained for  $p_{ij} > 0$  when  $p_i = p_{ij}/t$ , i.e., when all other subsystems have a transcription frequency of 0 for the  $i$ th gene; meanwhile the terms in the summation with  $p_{ij} = 0$  are all 0. Thus the maximum weighted value of  $\log_2(p_{ij}/p_i)$  is  $\log_2(t)$ , which sets up an upper bound for the average  $D_j$ . This upper bound is attainable if and

only if all genes expressed in the  $j$ th subsystem are not expressed in any other subsystem, i.e., if  $p_i = p_{ij}/t$  for all  $p_{ij} > 0$ . On the other hand, the lower bound of 0 for the Kullback–Leibler divergence is well established; thus, the range of  $D_j$  is  $(0, \log_2(t))$ . The minimum value is reached when  $p_{ij} = p_i$  for all  $i$  in the  $j$ th subsystem. This contrasts with the case of  $\delta_j$ , whose lower bound requires  $p_{ij} = p_i$  for all  $i$  and all  $j$ .

The Kullback–Leibler distance  $D_j$  is related in this context with the mutual information  $I(X|Y)$ :

$$I(X|Y) = \frac{1}{t} \sum_{j=1}^t \left[ \sum_{i=1}^g p_{ij} \log_2(p_{ij}) - \sum_{i=1}^g p_{ij} \log_2(p_i) \right]$$

$$= \frac{1}{t} \sum_{j=1}^t \sum_{i=1}^g p_{ij} \log_2 \left( \frac{p_{ij}}{p_i} \right) = \frac{1}{t} \sum_{j=1}^t D_j$$

1. Ewens WJ, Grant GR (2001) *Statistical Methods in Bioinformatics* (Springer, New York), p 45.
2. Taneja U (2001) *Generalized Information Measures and Their Applications* (Departamento de Matemática, Universidade Federal de Santa Catarina, Florianópolis, SC, Brazil).

Thus, the average mutual information  $I(X|Y)$  is the average of the  $D_j$  values across subsystems, and the following equality holds

$$I(X|Y) = I(Y|X) = \frac{1}{t} \sum_{j=1}^t D_j = \frac{1}{t} \sum_{j=1}^t \delta_j = \sum_{i=1}^g p_i S_i$$

From this equality, it can be seen that, regardless of the upper bounds of the individual values of  $D_j$ ,  $\delta_j$  and  $S_i$ , their averages will be bounded above by  $\text{Min}\{\text{Max}[I(X|Y)], \text{Max}[I(Y|X)]\}$ , i.e.,  $\text{Min}[\log_2(t), \log_2(g)]$ . Furthermore, given that the first term in  $I(X|Y)$  is exactly the entropy  $H(X)$ , already defined as the whole system diversity  $H$ , the averages of the three parameters  $D_j$ ,  $\delta_j$  and  $S_i$  are limited above by the entropy of the average transcription frequencies. (S20) gives a comprehensive presentation of the information measures.

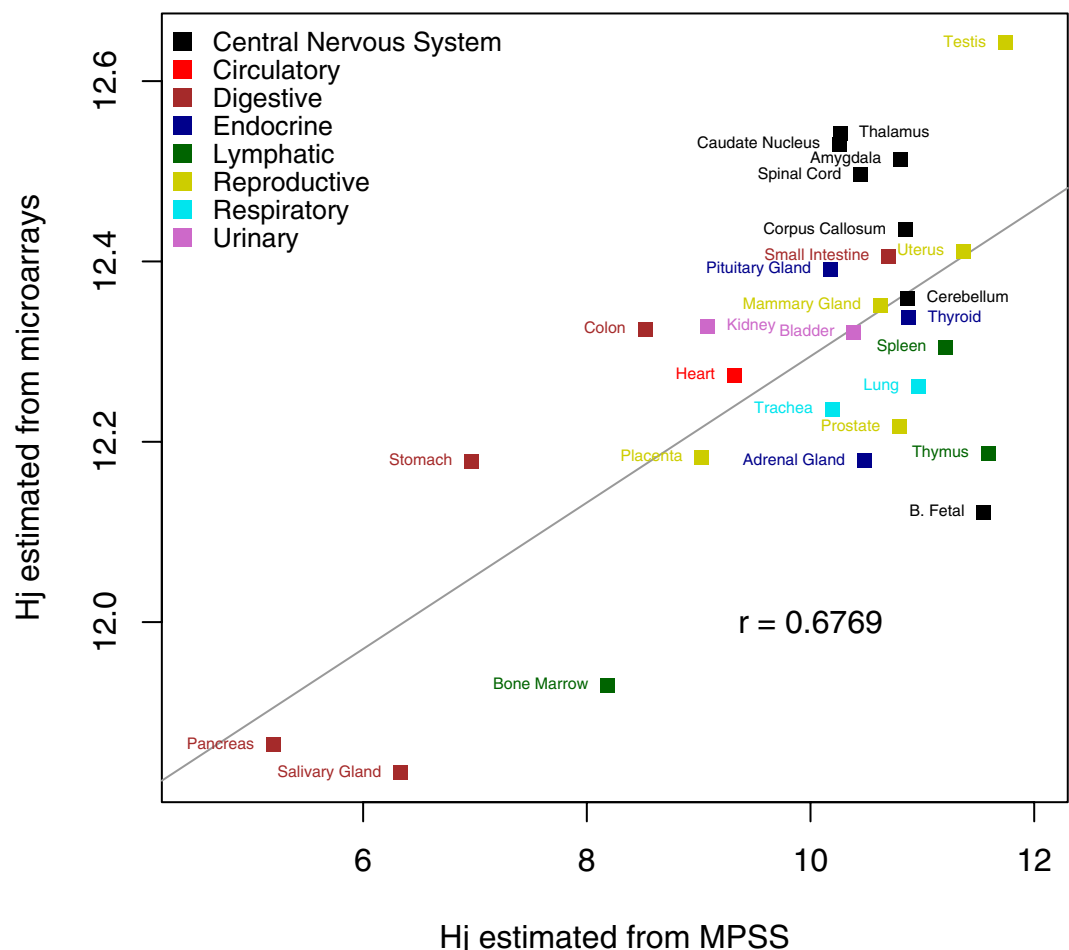

**Fig. S1.** Scatter plot for the estimated values of  $H_j$  from the MPSS (x axis) and microarray dataset (y axis) in the 28 shared tissues between datasets. Tissues are colored by system of origin. The gray line indicates a lineal model fitted between the two variables. The value of the r Pearson's correlation coefficient is presented as text.

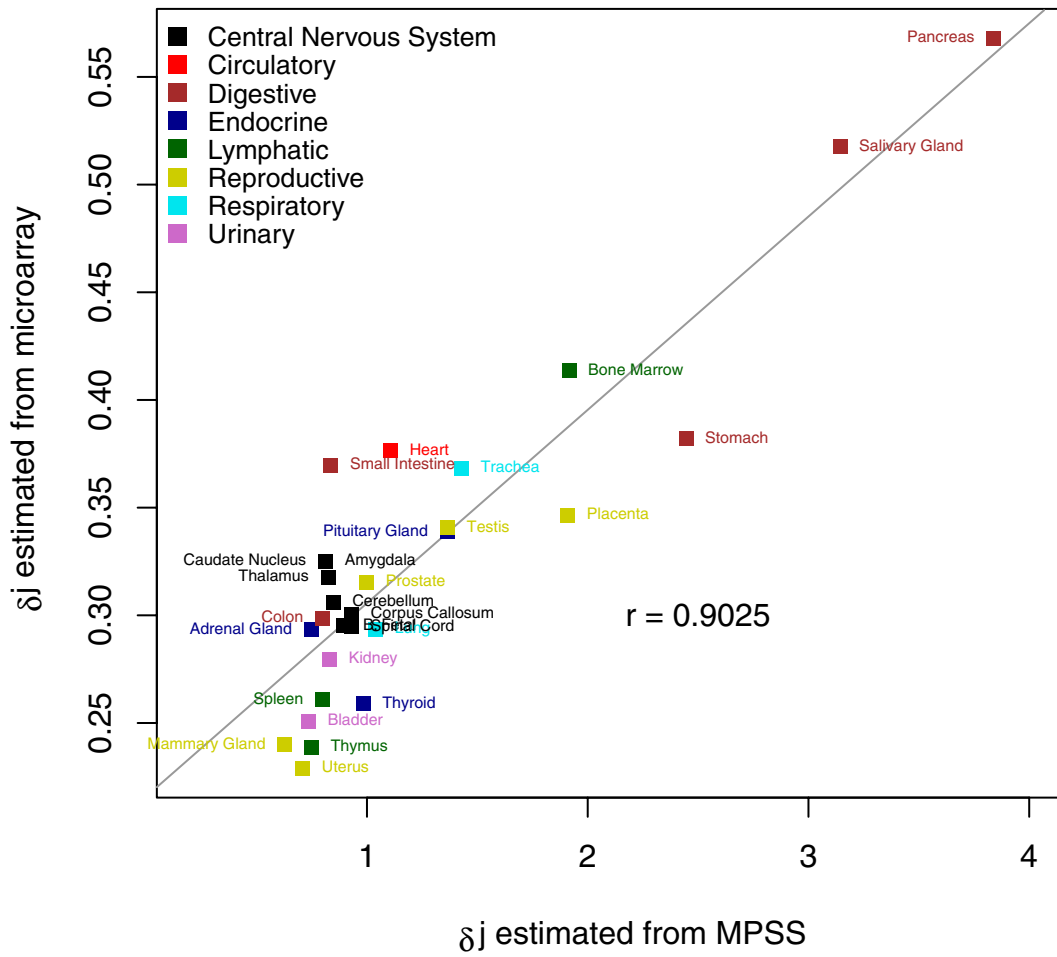

**Fig. S2.** Scatter plot for the estimated values of  $\delta_j$  from the MPSS (x axis) and microarray dataset (y axis) in the 28 shared tissues between datasets. Tissues are colored by system of origin. The gray line indicates a lineal model fitted between the two variables. The value of the r Pearson's correlation coefficient is presented as text.

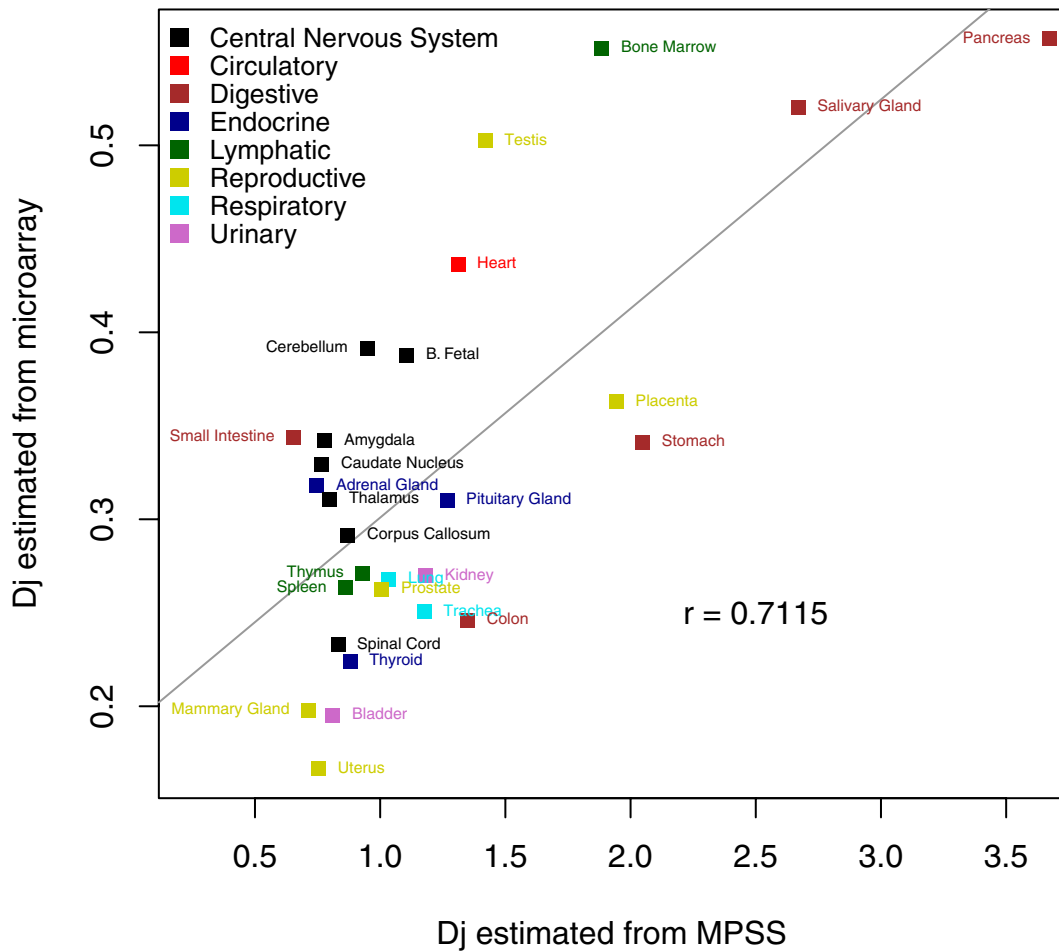

**Fig. S3.** Scatter plot for the estimated values of  $D_j$  from the MPSS (x axis) and microarray dataset (y axis) in the 28 shared tissues between datasets. Tissues are colored by system of origin. The gray line indicates a lineal model fitted between the two variables. The value of the r Pearson's correlation coefficient is presented as text.

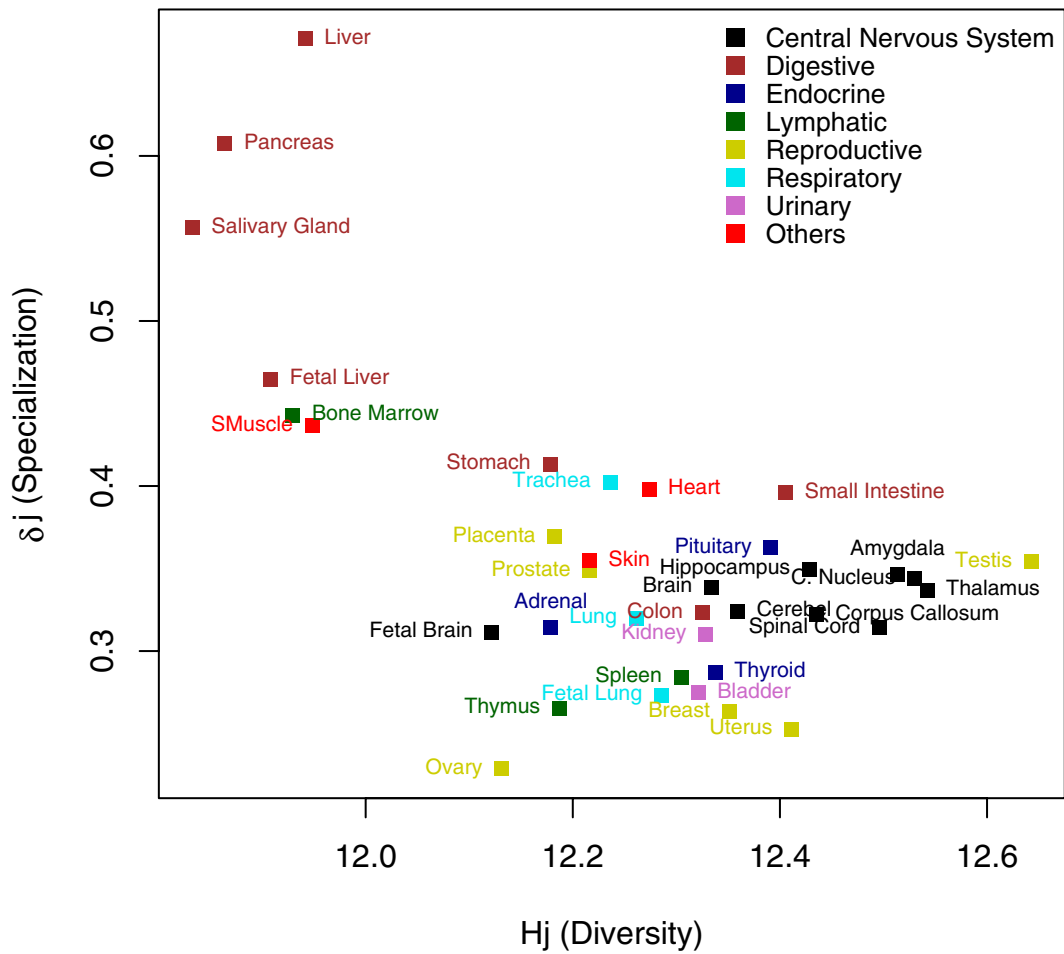

**Fig. S4.** Scatter plot of estimated values of  $H_j$  (diversity) vs.  $\delta_j$  (specialization, given by the average gene specificity) for the 36 tissues of the human systems included in the microarray dataset. Tissues are colored by system of origin.

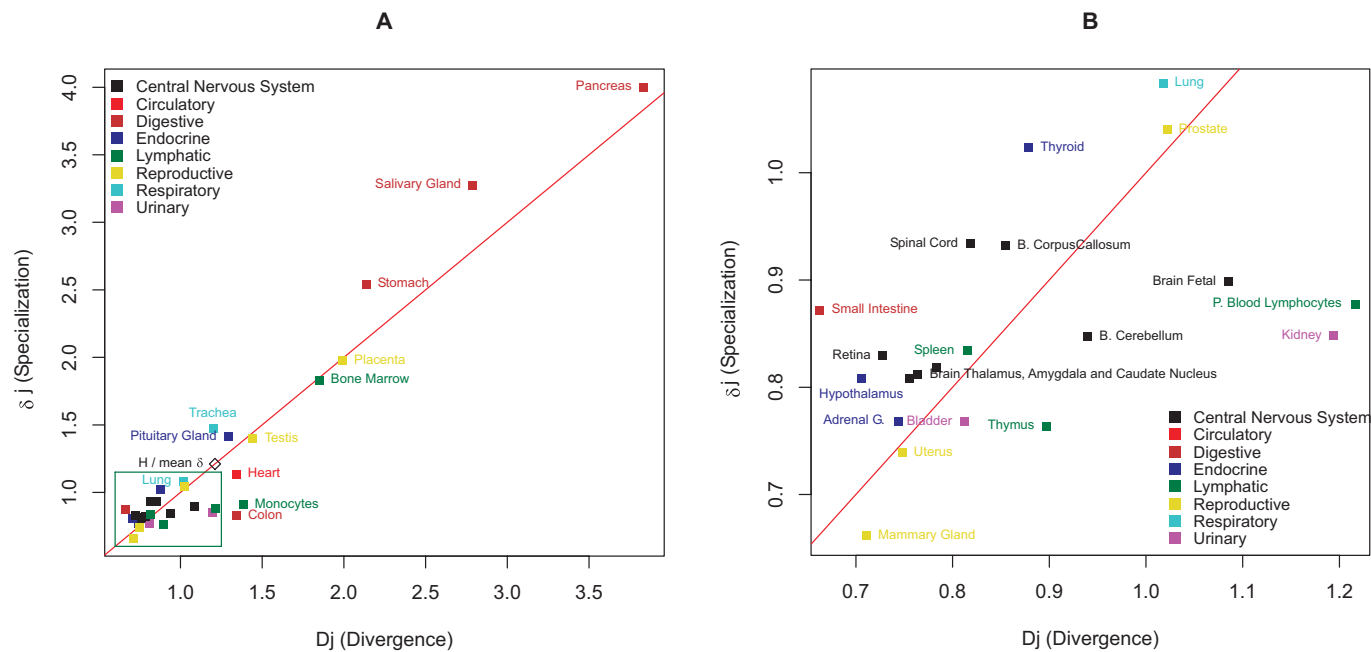

**Fig. S5.** Scatter plot of estimated values of  $D_j$  (divergence) versus  $\delta_j$  (specialization) for tissues of the human systems obtained from the MPSS dataset. Tissues are colored by system of origin. A red line indicates the values where  $D_j = \delta_j$ . B is an amplification of the box in A.

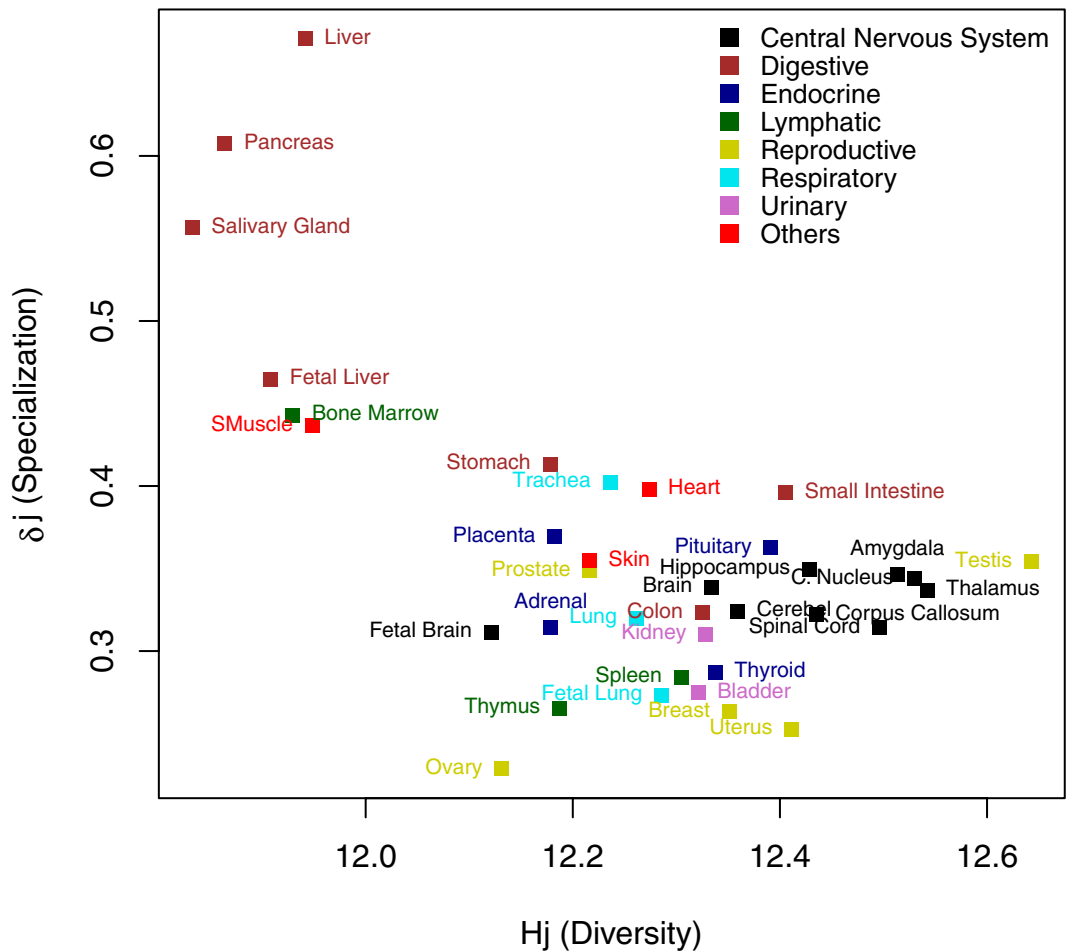

**Fig. S6.** Scatter plot of estimated values of  $H_j$  (diversity) versus  $\delta_j$  (specialization, given by the average gene specificity) for the 36 tissues of the human systems included in the microarray dataset. Tissues are colored by system of origin.



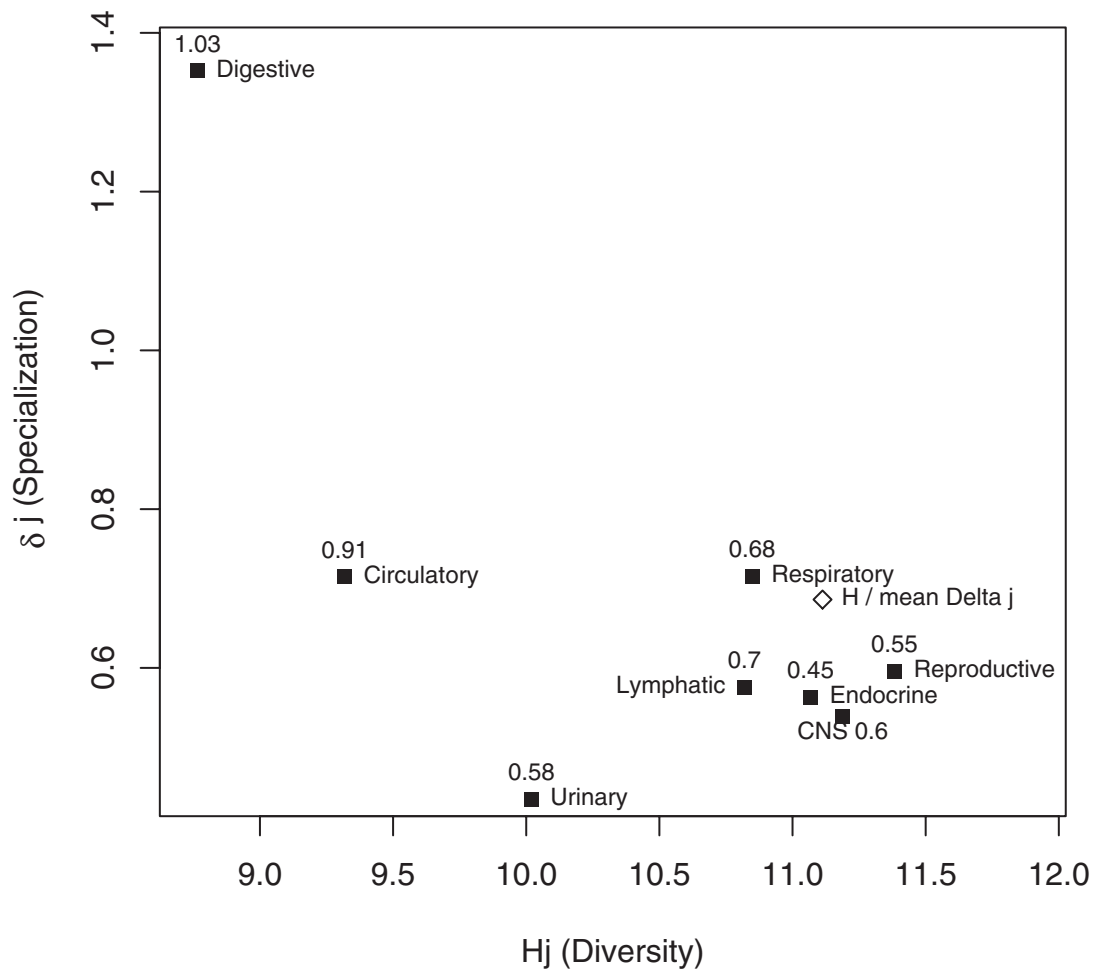

**Fig. S7.** Scatter plot of estimated values of  $H_j$  (diversity) vs.  $\delta_j$  (Specialization, given by the average gene specificity) for each human system using the MPSS dataset. The values of  $D_j$  (divergence) for each tissue are shown close to each data point. The point of  $H$  for the whole system and the mean of  $\delta_j$  is shown by a diamond.

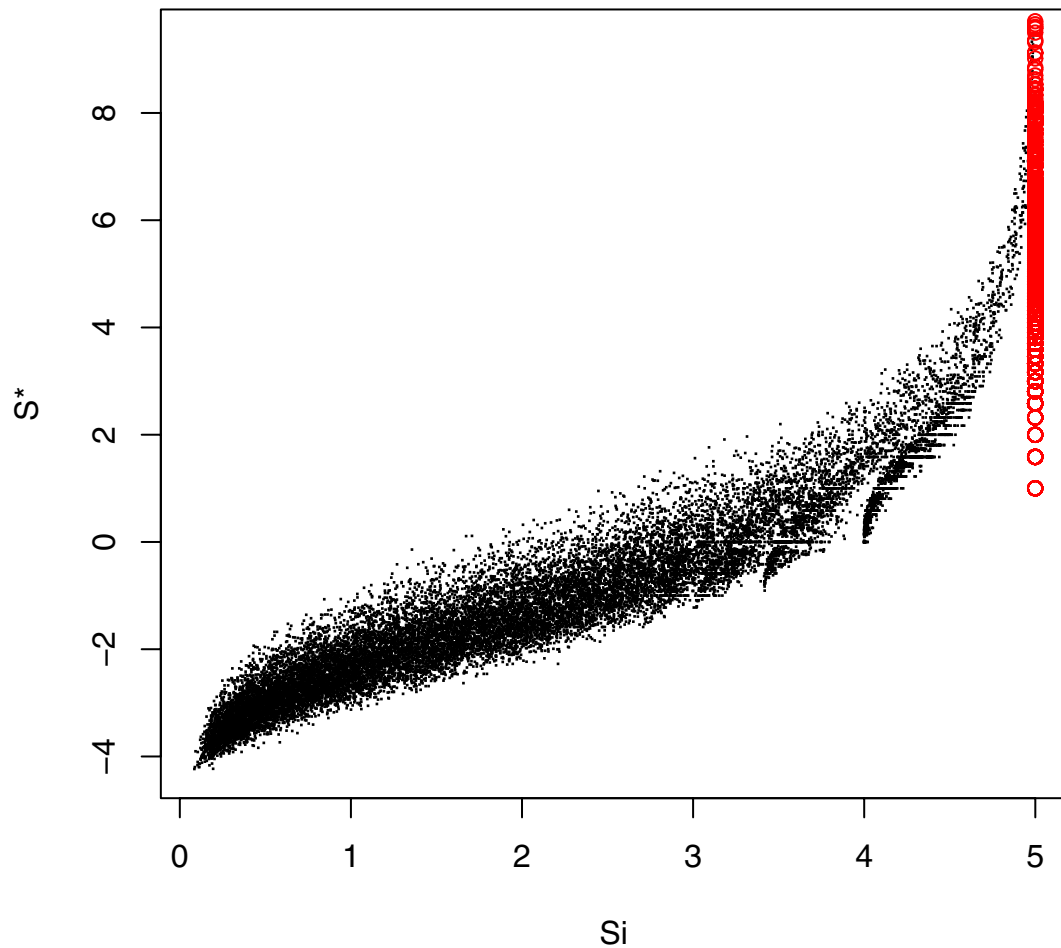

**Fig. S8.** Scatter plot for the values of the specificity coefficient proposed in Jongeneel *et al.* [Jongeneel CV *et al.* (2005) An atlas of human gene expression from massively parallel signature sequencing (MPSS). *Genome Res* 15:1007–1014],  $S^*$ , and our specificity coefficient  $S_i$  for the genes in the MPSS human dataset. Red symbols are used for genes that reached the maximum value of  $S_i$ . Notice how the rank in  $S^*$  of the specific genes ( $S_i = 5$ ) includes genes with low values for  $S^*$ , implying misclassification of specific genes when using the  $S^*$  coefficient.

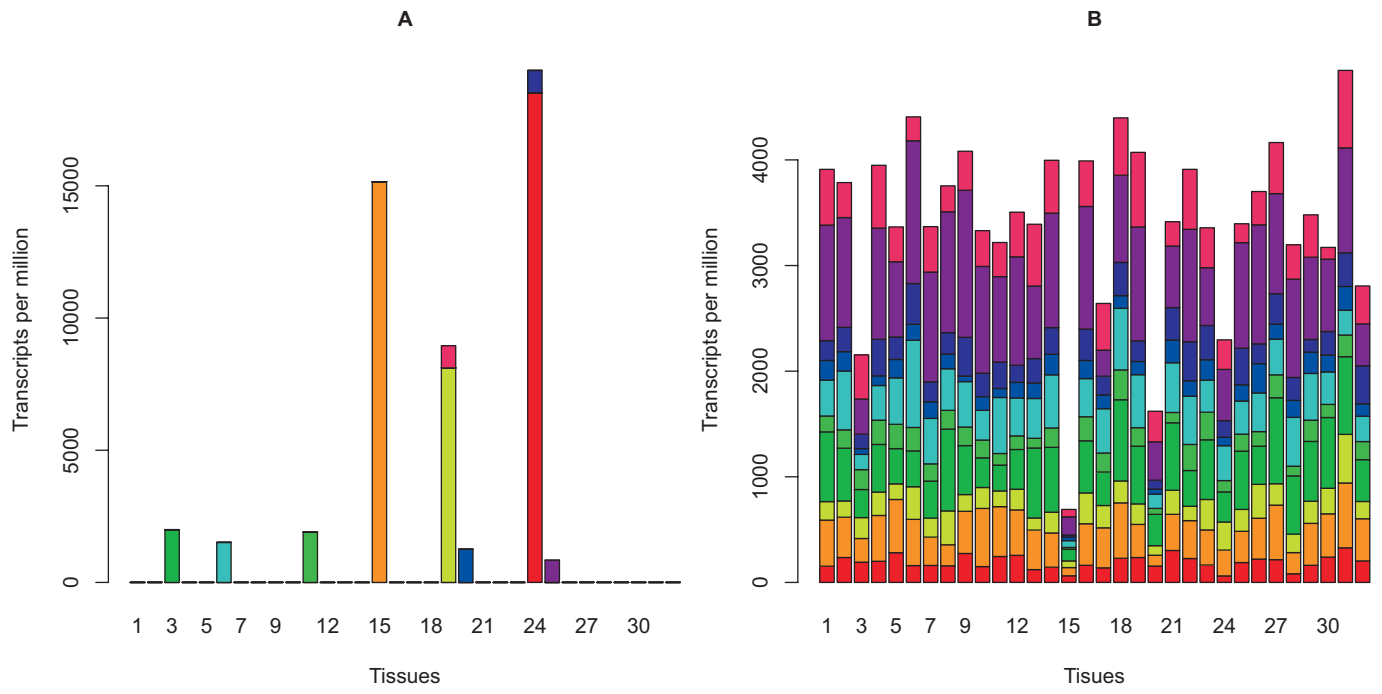

**Fig. 59.** Bar diagrams for the relative frequency of transcription in transcripts per million of 10 genes with the maximum values of  $S_i$  ( $S_i = 5$ ; A) and the 10 genes with the lowest values of  $S_i$  (B). Data resulted from the analysis of the MPSS dataset. Tissues are numbered from 1 to 32 in the x axis. Relative frequencies of each gene are represented in a distinct color for each gene in each image independently.

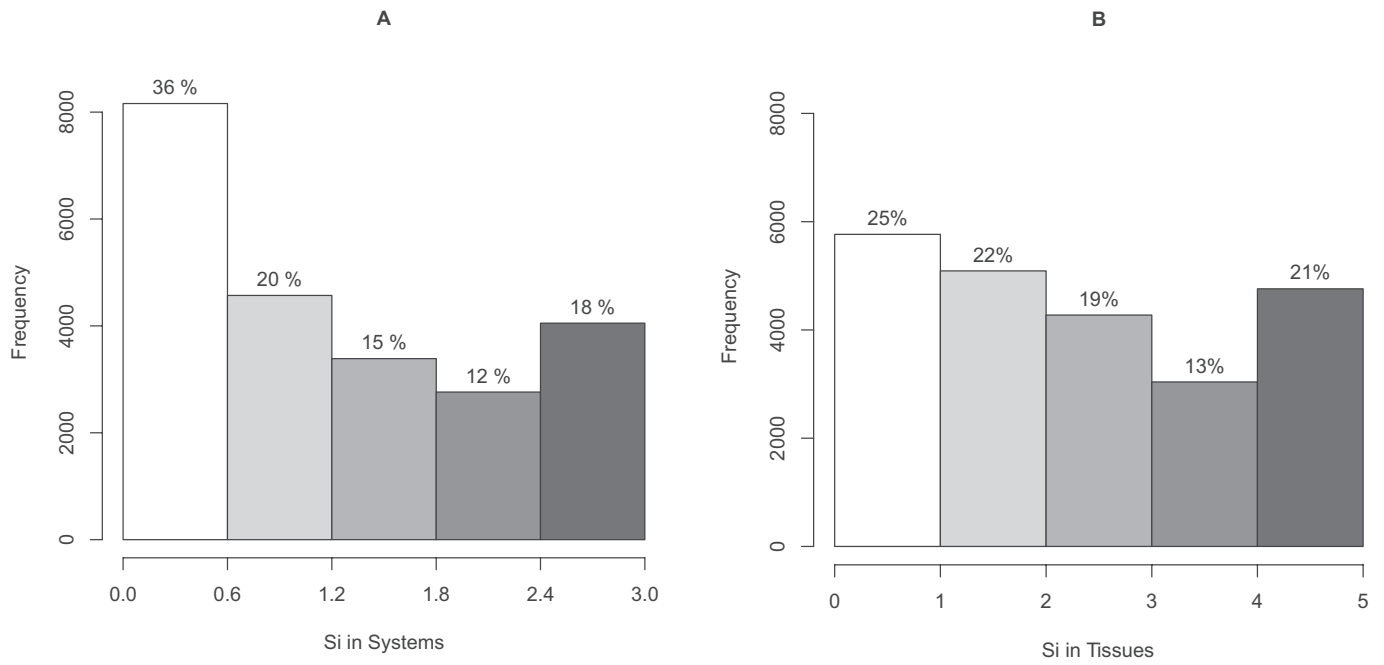

**Fig. S10.** Histograms for the values of gene specificity,  $S_i$ , when the tissues are grouped into systems (A) or are taken at tissue level (B) in the MPSS dataset. To make the graphs comparable the same number of classes is used in both cases and the frequency scale is the same. Percentages of observatons grouped in each class are shown above every bar. Gray tones are used from left to right to remark higher values of specificity.

Table S1. Information properties of human systems and tissues estimated from the MPSS dataset

| System/tissue                | Tags             | $H_j$          | $\delta_j$    | $D_j$         |
|------------------------------|------------------|----------------|---------------|---------------|
| <b>CNS</b>                   | <b>9,818,779</b> | <b>11.1892</b> | <b>0.5385</b> | <b>0.5982</b> |
| Brain amygdala               | 973,569          | 10.8043        | 0.8115        | 0.7641        |
| Brain caudate nucleus        | 1,039,527        | 10.2568        | 0.8079        | 0.7550        |
| Brain cerebellum             | 902,231          | 10.8696        | 0.8471        | 0.9398        |
| Brain corpus callosum        | 882,445          | 10.8472        | 0.9322        | 0.8547        |
| Brain fetal                  | 767,919          | 11.5496        | 0.8982        | 1.0850        |
| Brain thalamus               | 1,076,935        | 10.2647        | 0.8184        | 0.7836        |
| Retina                       | 929,482          | 11.3452        | 0.8295        | 0.7275        |
| Spinal cord                  | 1,046,877        | 10.4470        | 0.9340        | 0.8187        |
| <b>Circulatory</b>           | <b>1,099,897</b> | <b>9.3186</b>  | <b>0.7147</b> | <b>0.9104</b> |
| Heart                        | 1,099,897        | 9.3186         | 1.1339        | 1.3404        |
| <b>Digestive</b>             | <b>5,145,463</b> | <b>8.7652</b>  | <b>1.3521</b> | <b>1.0310</b> |
| Colon                        | 1,028,538        | 8.5206         | 0.8289        | 1.3411        |
| Pancreas                     | 1,122,006        | 5.1984         | 4.0019        | 3.8331        |
| Salivary gland               | 1,010,284        | 6.3352         | 3.2754        | 2.7890        |
| Small intestine              | 995,657          | 10.6991        | 0.8718        | 0.6627        |
| Stomach                      | 988,978          | 6.9693         | 2.5434        | 2.1350        |
| <b>Endocrine</b>             | <b>4,074,576</b> | <b>11.0680</b> | <b>0.5629</b> | <b>0.4455</b> |
| Adrenal gland                | 1,054,497        | 10.4812        | 0.7683        | 0.7438        |
| Brain hypothalamus           | 983,980          | 10.7645        | 0.8084        | 0.7056        |
| Pituitary gland              | 1,068,227        | 10.1772        | 1.4137        | 1.2957        |
| Thyroid                      | 967,872          | 10.8784        | 1.0235        | 0.8786        |
| <b>Lymphatic</b>             | <b>4,553,040</b> | <b>10.8201</b> | <b>0.5752</b> | <b>0.7005</b> |
| Bone marrow                  | 1,010,511        | 8.1848         | 1.8321        | 1.8479        |
| Monocytes                    | 875,905          | 10.7058        | 0.9081        | 1.3827        |
| Peripheral blood lymphocytes | 879,033          | 9.4792         | 0.8776        | 1.2167        |
| Spleen                       | 923,030          | 11.2090        | 0.8342        | 0.8149        |
| Thymus                       | 864,561          | 11.5884        | 0.7635        | 0.8969        |
| <b>Reproductive</b>          | <b>4,887,892</b> | <b>11.3831</b> | <b>0.5955</b> | <b>0.5489</b> |
| Mammary gland                | 1,037,119        | 10.6225        | 0.6615        | 0.7108        |
| Placenta                     | 939,372          | 9.0287         | 1.9777        | 1.9911        |
| Prostate                     | 1,012,568        | 10.7959        | 1.0404        | 1.0219        |
| Testis                       | 956,455          | 11.7426        | 1.3973        | 1.4422        |
| Uterus                       | 942,378          | 11.3665        | 0.7388        | 0.7478        |
| <b>Respiratory</b>           | <b>2,010,992</b> | <b>10.8485</b> | <b>0.7153</b> | <b>0.6772</b> |
| Lung                         | 994,976          | 10.9640        | 1.0836        | 1.0177        |
| Trachea                      | 1,016,016        | 10.1933        | 1.4710        | 1.1992        |
| <b>Urinary</b>               | <b>2,021,104</b> | <b>10.0194</b> | <b>0.4348</b> | <b>0.5773</b> |
| Bladder                      | 978,049          | 10.3861        | 0.7678        | 0.8119        |
| Kidney                       | 1,043,055        | 9.0806         | 0.8479        | 1.1942        |

Tags, total number of gene tags sampled in the system or tissue.  $H_j$ , measure of diversity;  $\delta_j$ , average gene specificity;  $D_j$ , divergence with the average transcriptome.
